# Supplementary material for: A novel ternary CuO decorated Ag3AsO4/GO hybrid as a Z-scheme photocatalyst for enhanced degradation of phenol under visible light
Source: Royal Society of Chemistry journal article supplement (doi:10.1039/c6nj02366e), 2016-12-24
Supplement: c6nj02366e1.pdf [file c6nj02366e1.pdf]

## Supporting Informations

### **A novel ternary CuO decorated $\text{Ag}_3\text{AsO}_4/\text{GO}$ hybrid as a Z-scheme photocatalyst for enhanced degradation of phenol under visible light**

Md.Rakibuddin, Subrata Mandal and Rajakumar Ananthakrishnan\*

*Department of Chemistry, Indian Institute of Technology, Kharagpur 721 302, India.*

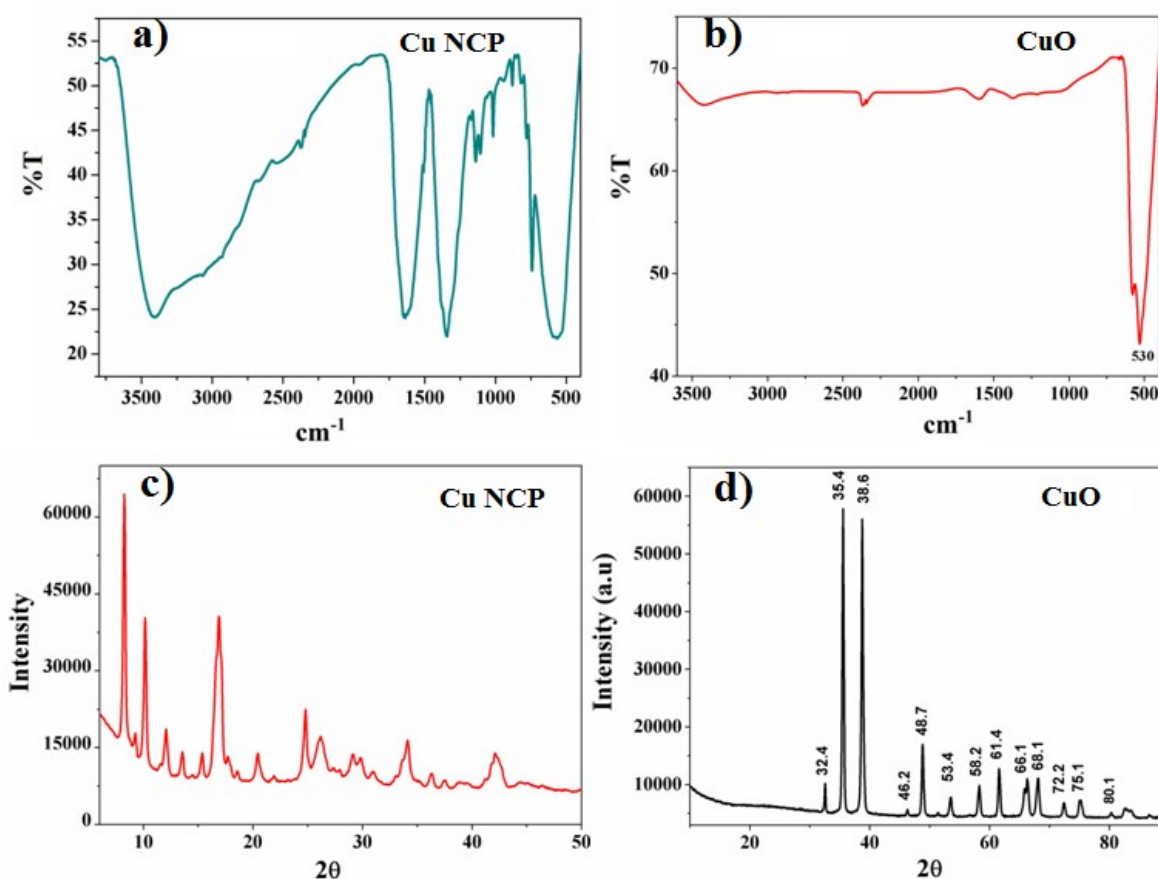

Figure S1. a) FT-IR spectra of the synthesized Cu NCP and b) corresponding CuO nanoparticles obtained from the Cu NCP after heating at 400 °C; c) PXRD pattern of the synthesized Cu NCP and d) corresponding NCP derived CuO nanoparticles.

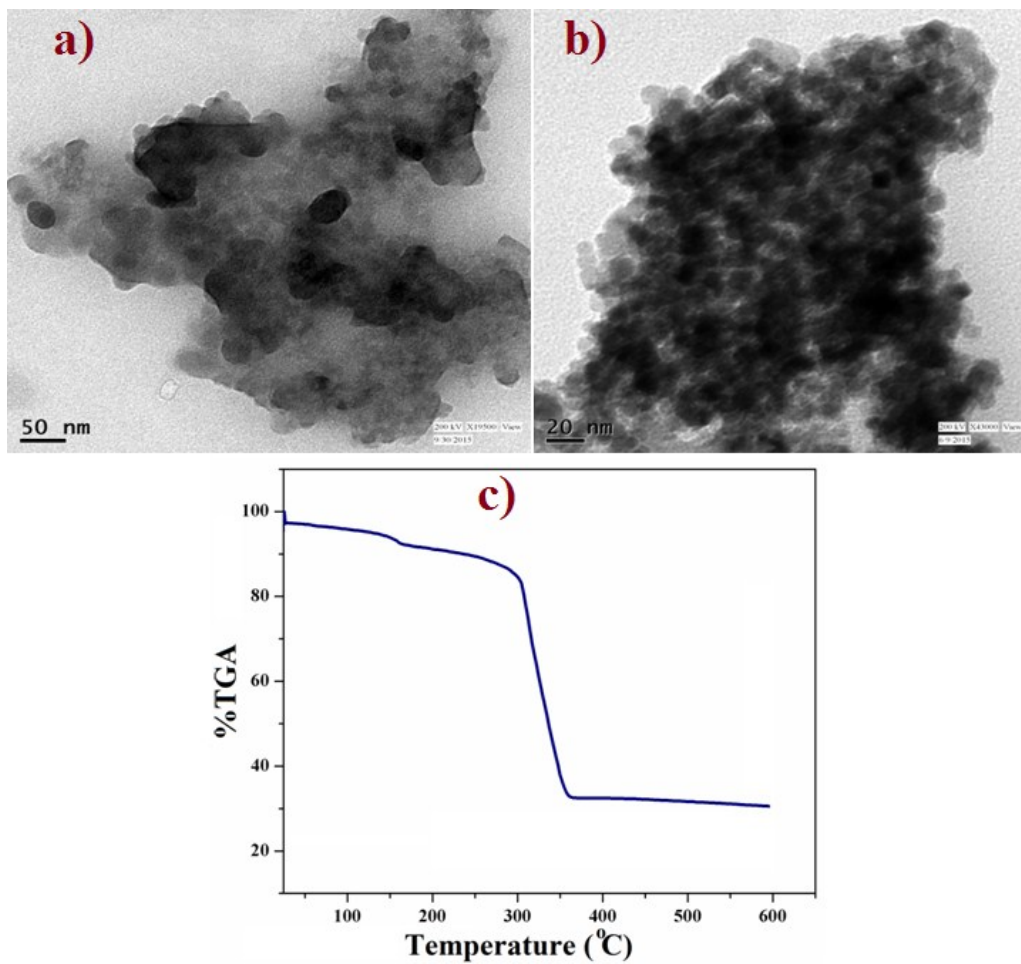

Figure S2. a) TEM image of the synthesized Cu NCP, b) corresponding NCP derived CuO nanoparticles and c) TGA analysis of the synthesized Cu NCP.

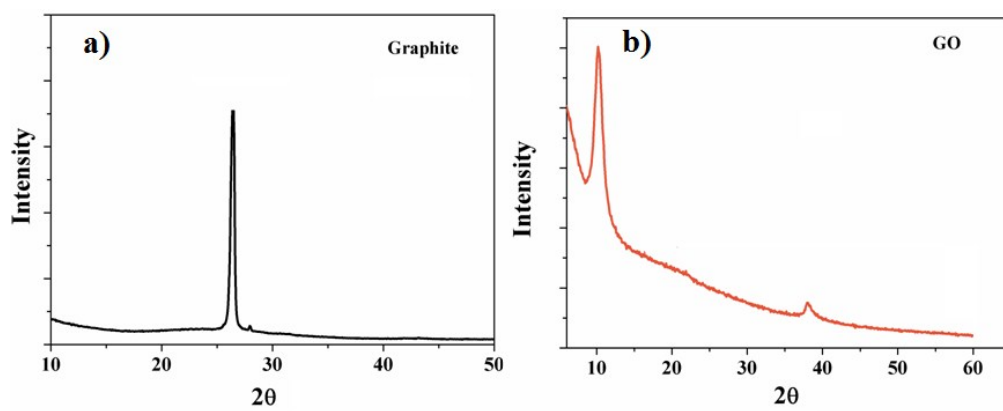

Figure S3. a) PXRD of the graphite and b) synthesized GO

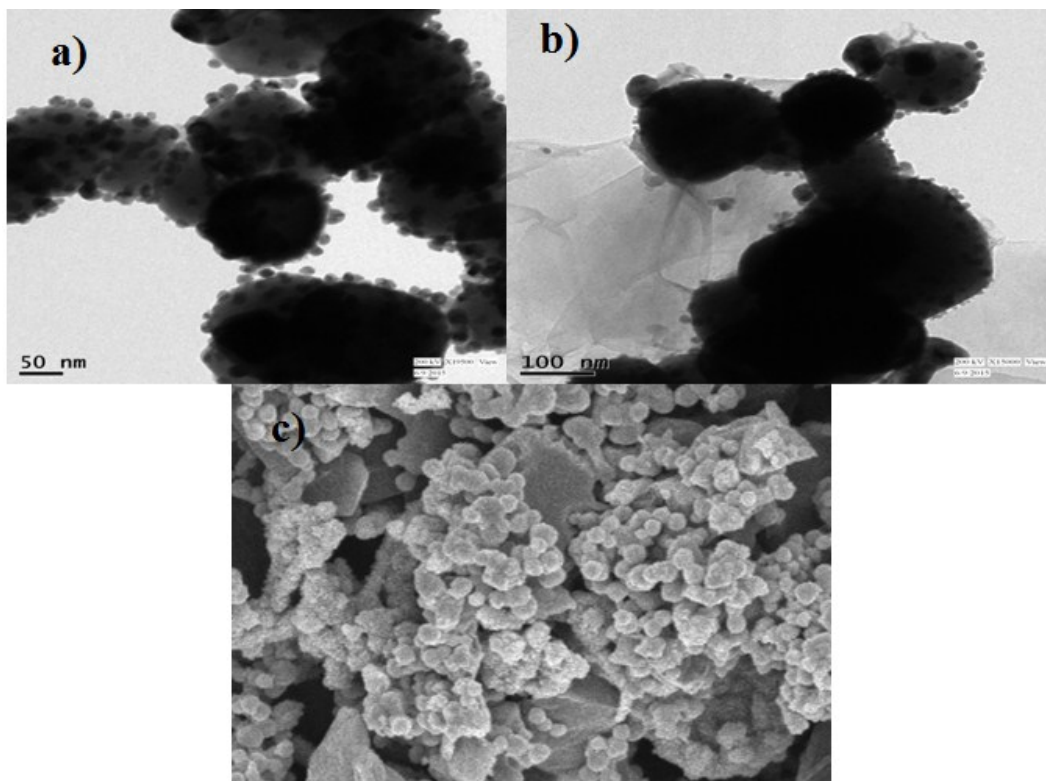

Figure S4. a) TEM image of the synthesized CuO/Ag<sub>3</sub>AsO<sub>4</sub>, b) CuO/Ag<sub>3</sub>AsO<sub>4</sub>/GO hybrid and c) FESEM image of the CuO/Ag<sub>3</sub>AsO<sub>4</sub>/GO hybrid.

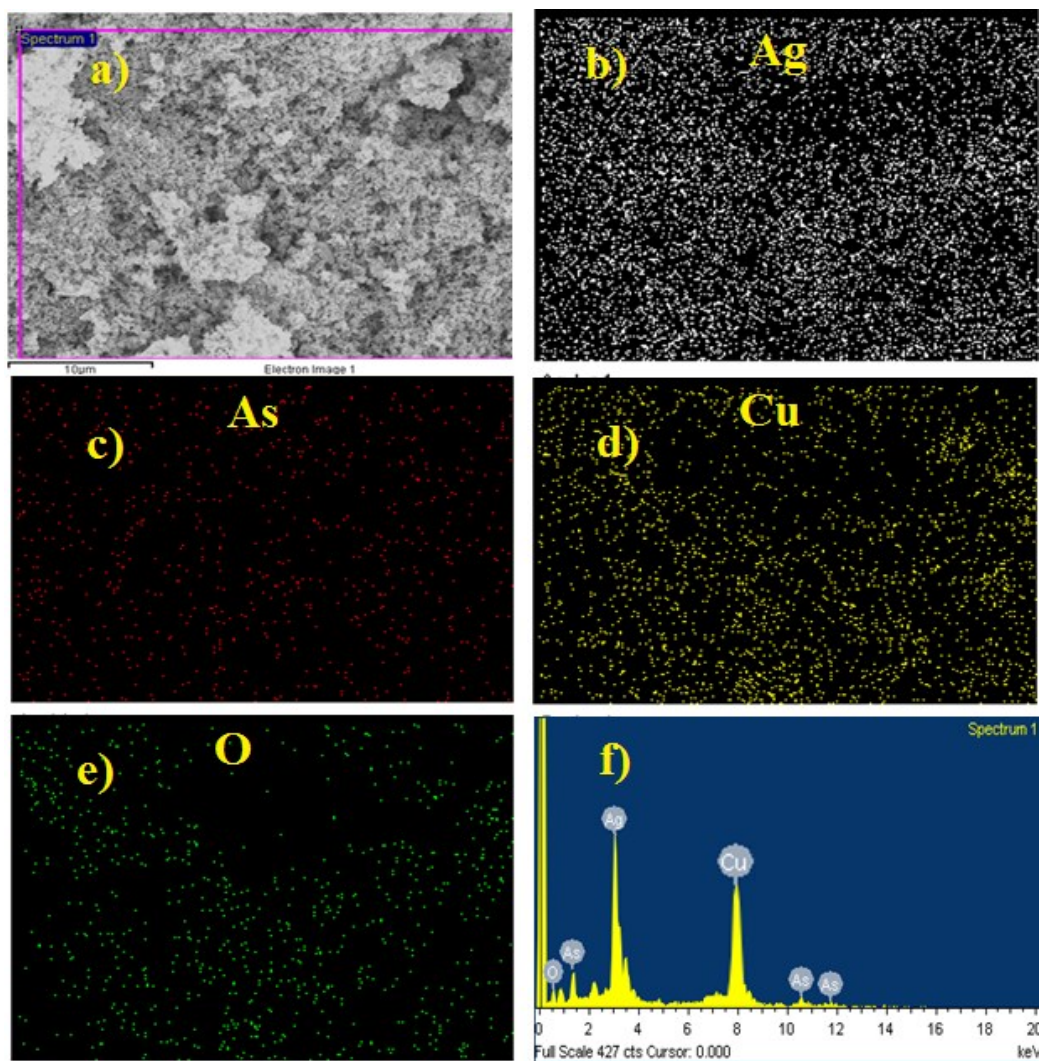

Figure S5. a) FESEM image of the CuO/Ag<sub>3</sub>AsO<sub>4</sub> hybrid, b) corresponding elemental mapping of Ag, c) As, d) Cu, e) O and f) EDX analysis of the CuO/Ag<sub>3</sub>AsO<sub>4</sub> hybrid.

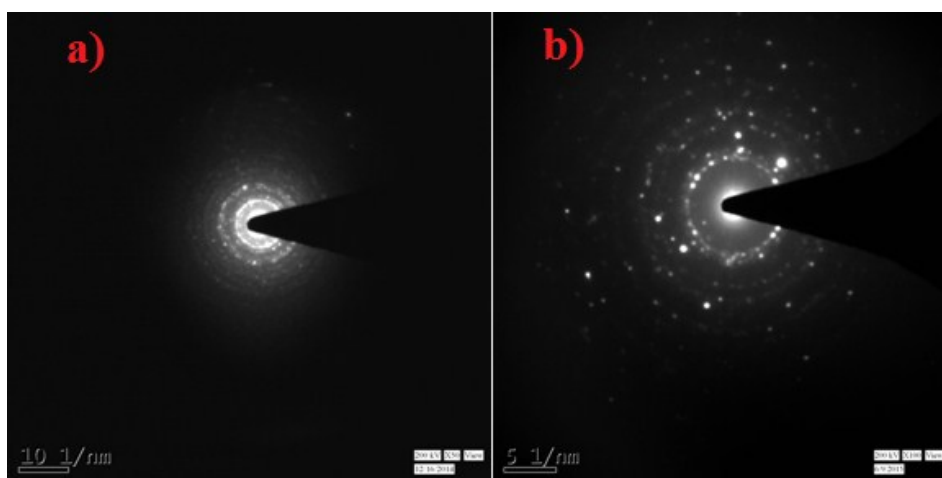

Figure S6. a) SAED pattern of the synthesized CuO and b) CuO/Ag<sub>3</sub>AsO<sub>4</sub> hybrid.

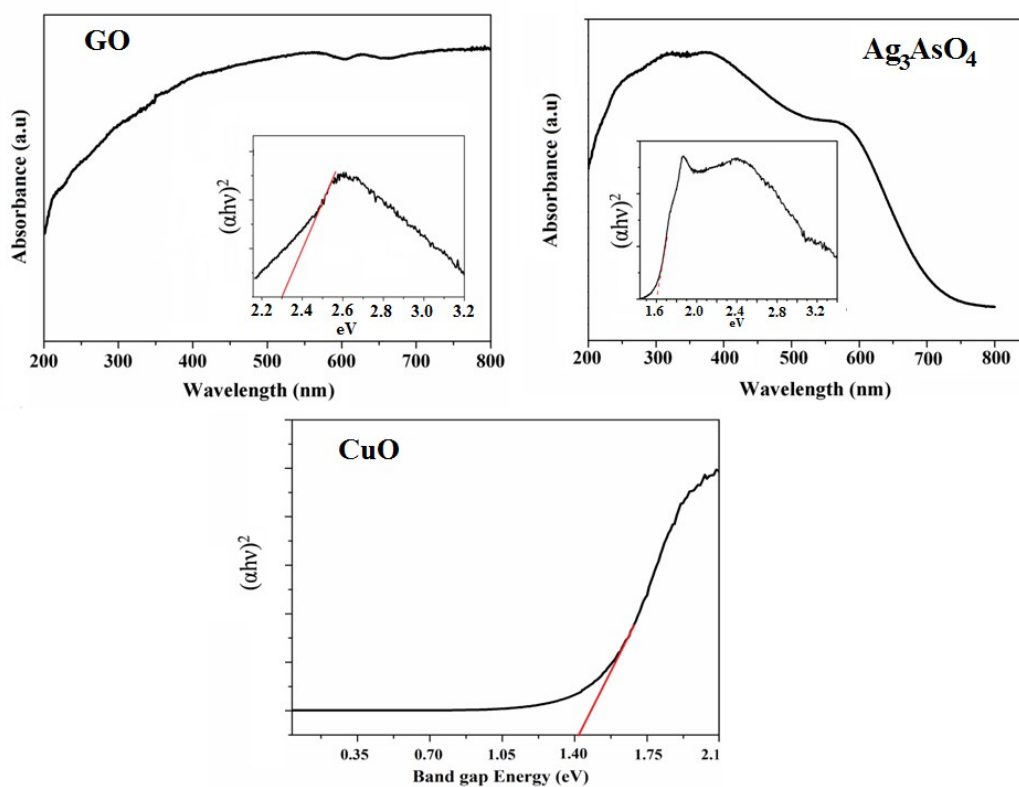

Figure S7. UV-Vis-DRS spectra and corresponding Tauc plot (inset) of the synthesized GO,  $\text{Ag}_3\text{AsO}_4$  and CuO for determination of band gap of the materials.

The observed band gap for the GO,  $\text{Ag}_3\text{AsO}_4$  and CuO are found to be 2.3 eV, 1.6 eV and 1.4 eV respectively.

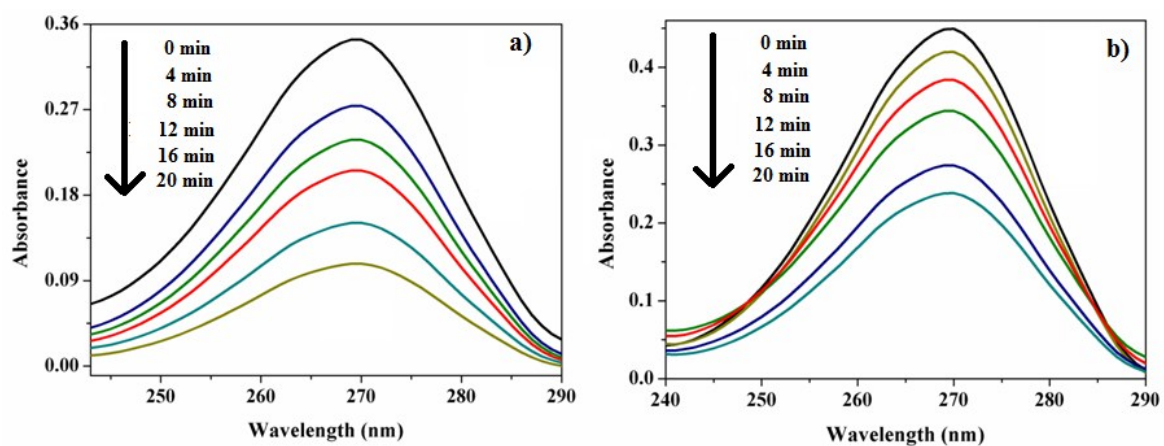

Figure S8. UV-Visible absorption spectra for the degradation of phenol by a) CuO/Ag<sub>3</sub>AsO<sub>4</sub>/GO-50 hybrid and b) CuO/Ag<sub>3</sub>AsO<sub>4</sub> hybrid under visible light.



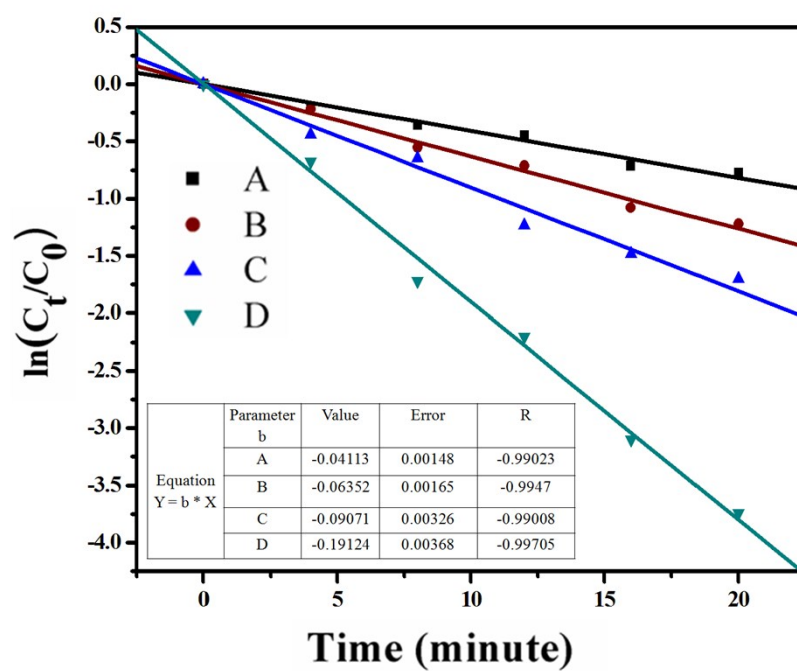

Figure S9.  $\ln C_t/C_0$  vs. Time plot for determination of rate constant of A) CuO/Ag<sub>3</sub>AsO<sub>4</sub>, B) Ag<sub>3</sub>AsO<sub>4</sub>/GO, C) CuO/Ag<sub>3</sub>AsO<sub>4</sub>/GO-50 and D) CuO/Ag<sub>3</sub>AsO<sub>4</sub>/GO-25 catalyst.

**Table S1. Comparative study for the photo-degradation of Phenol in presence of various semiconductor hybrids**

| Entry | Experimental Conditions                                                                                                                 | Performance (rate constant $k$ , $\text{min}^{-1}$ ) | References  |
|-------|-----------------------------------------------------------------------------------------------------------------------------------------|------------------------------------------------------|-------------|
| 1.    | [Phenol]=7 ppm, [TiO <sub>2</sub> /Fly ash] = 20 g L <sup>-1</sup><br>UV Light intensity = 300 W Hg lamp                                | $1.6 \times 10^{-2}$                                 | 50          |
| 2.    | [Phenol]= 10 ppm<br>[Ag/Ag <sub>2</sub> CO <sub>3</sub> -rGO]= 2 g L <sup>-1</sup><br>Visible Light intensity = 350 W Xe lamp           | $1.5 \times 10^{-1}$                                 | 47          |
| 3.    | [Phenol]= 40 ppm<br>[ZnO-G/TiO <sub>2</sub> -G]= 1 g L <sup>-1</sup><br>Visible Light intensity = 1000 W Xe arc lamp                    | $3.7 \times 10^{-2}$                                 | 48          |
| 4.    | [Phenol]= 30 ppm<br>[Au/TiO <sub>2</sub> ] thin film<br>Sun light                                                                       | $1.1 \times 10^{-2}$                                 | 49          |
| 5.    | [Phenol]= 15 ppm<br>[Pt/I-TiO <sub>2</sub> ]= 1 g L <sup>-1</sup><br>Visible Light intensity = 400 W dysprosium lamp                    | $1.0 \times 10^{-2}$                                 | 45          |
| 6.    | [Phenol]= 25 ppm<br>[WO <sub>3</sub> /H <sub>2</sub> O <sub>2</sub> ]= 1.3 g L <sup>-1</sup><br>Visible Light intensity = 150 W Xe lamp | $1.7 \times 10^{-2}$                                 | 44          |
| 7.    | [Phenol]= 10 ppm<br>[g-C <sub>3</sub> N <sub>4</sub> ]= 1.0 g L <sup>-1</sup><br>Visible Light intensity = 300 W Xe lamp                | $9.5 \times 10^{-3}$                                 | 46          |
| 8.    | [Phenol]= 20 ppm<br>[CuO/Ag <sub>3</sub> AsO <sub>4</sub> /GO]= 0.2 g L <sup>-1</sup><br>Visible Light intensity = 300 W halogen lamp   | $1.9 \times 10^{-1}$                                 | This report |

44. J. Sheng, X. Li and Y. Xu, *ACS Catal.*, 2014, **4**, 732–73.

45. Z. He, L. Xie, J. Tu, S. Song, W. Liu, Z. Liu, J. Fan, Q. Liu and J. Chen, *J. Phys. Chem. C*, 2010, **114**, 526–532.

46. H. Zhang, L. H. Guo, L. Zhao, B. Wan and Y. Yang, *J. Phys. Chem. Lett.*, 2015, **6**, 958–963.

47. S. Song, B. Cheng, N. Wu, A. Meng, S. Cao and J. Yu, *Appl. Catal. B: Environ.*, 2016, **181**, 71–78.
48. G. Malekshoar, K. Pal, Q. He, A. Yu and A. K. Ray, *Ind. Eng. Chem. Res.*, 2014, **53**, 18824–18832.
49. R.S. Sonawane and M.K. Dongare, *J. Molecular. Catal A: Chemical* , 2006, **243**, 68–76.
50. Z. Shi, S. Yao and C. Sui, *Catal. Sci. Technol.*, 2011, **1**, 817–822.

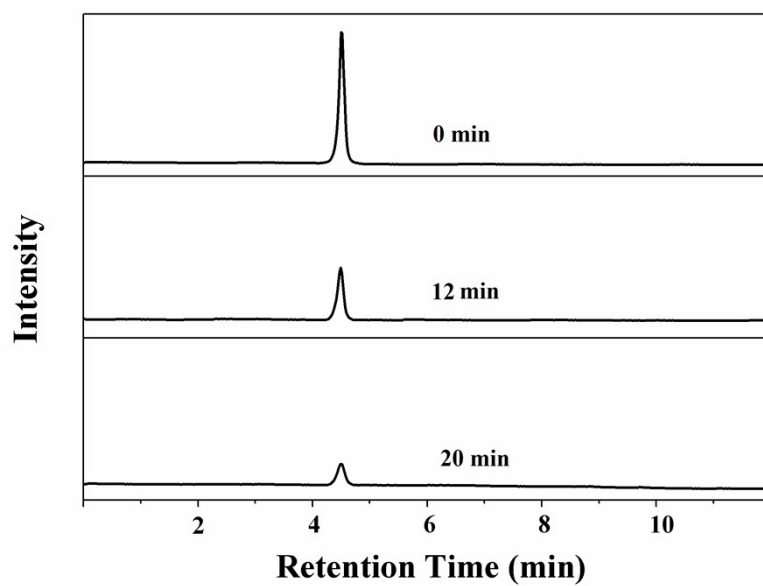

**Figure S10.** HPLC chromatographic peaks for the photodegradation of Phenol in presence of  $\text{CuO}/\text{Ag}_3\text{AsO}_4/\text{GO}$ -25 catalyst.

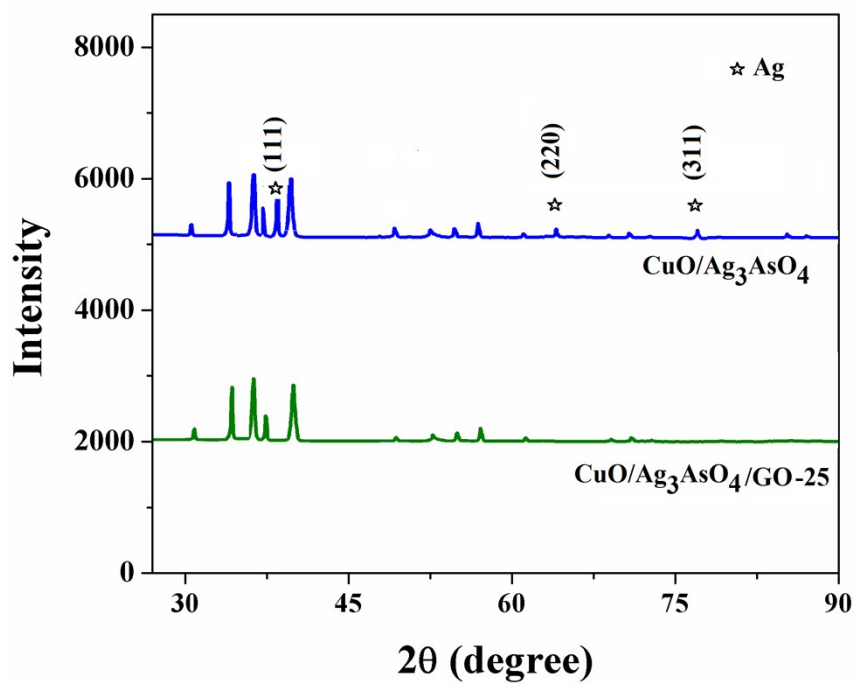

**Figure S11.** PXRD pattern of the  $\text{CuO}/\text{Ag}_3\text{AsO}_4/\text{GO-25}$  and  $\text{CuO}/\text{Ag}_3\text{AsO}_4$  catalyst after fourth cycle of photocatalytic operation.

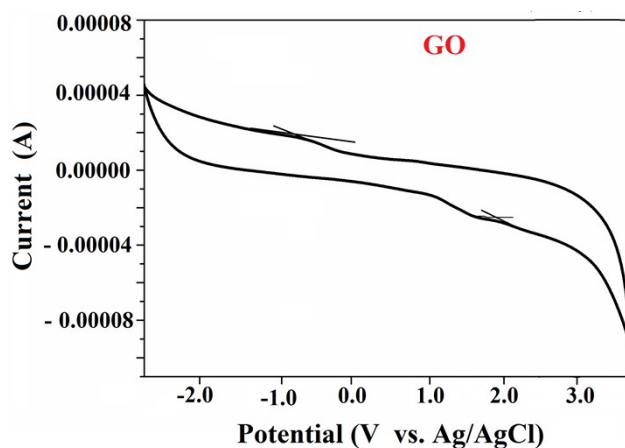

Figure S12. Cyclic voltammograms of Graphene oxide (GO) (0.1 M KCl , scan rate 50 mV s<sup>-1</sup>, scan direction from -3.0 V to 4.0 V vs. Ag/AgCl).

$$\text{HOMO} = -e [4.65 \text{ V} - E_{\text{ox}} (\text{onset})] = -4.65 \text{ eV} - 1.9 \text{ eV} = -6.55 \text{ eV (vs. Vacuum scale)}$$

Using the equation ( $E_{(\text{NHE})} = -E_{(\text{AVS})} - 4.50$ ), we get

$$\text{HOMO} = 2.05 \text{ eV [vs. NHE]}$$

$$\text{LUMO} = -e [4.65 \text{ V} - E_{\text{red}} (\text{onset})] = -4.65 \text{ eV} + 0.9 \text{ eV} = -3.75 \text{ eV (vs. Vacuum scale)}$$

Using the equation ( $E_{(\text{NHE})} = -E_{(\text{AVS})} - 4.50$ ), we get

$$\text{LUMO} = -0.75 \text{ eV [vs. NHE]}$$

$$\text{Band gap } (E_g) = \text{LUMO} - \text{HOMO} = 6.55 \text{ eV} - 3.75 \text{ eV} = 2.8 \text{ eV (vs. NHE)}$$

However the electrochemically obtained band gap of the GO (2.8 eV) is found to be somewhat higher than optical band gap of the GO (2.3 eV).

(*J. Mater. Chem.*, 2012, **22**, 4299-4305; *Am. Mineral.*, 2000, **85**, 543-556.)

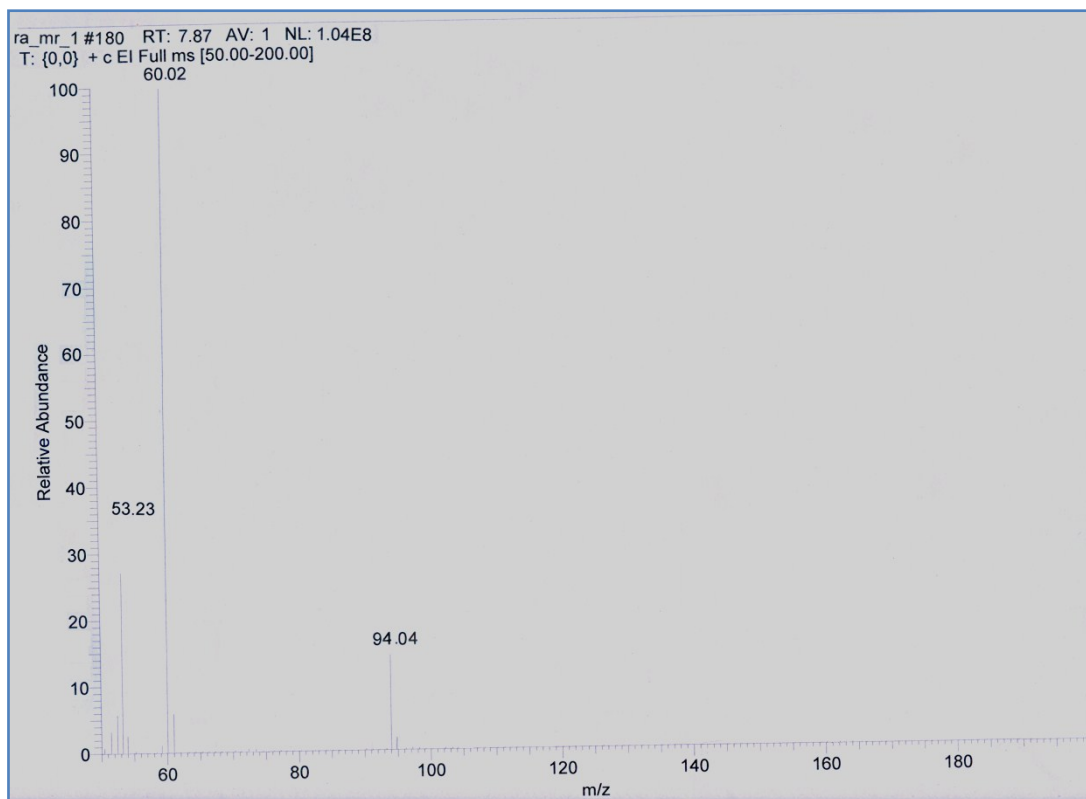

Figure S13. GC-MS spectrum of the photo-degraded products of Phenol after 20 min of the photocatalytic reaction.
